# Supplementary material for: XAC4296 Is a Multifunctional and Exclusive Xanthomonadaceae Gene Containing a Fusion of Lytic Transglycosylase and Epimerase Domains
Source: Microorganisms. 2022 May 11;10(5):1008. doi: 10.3390/microorganisms10051008 (PMC9143381; doi:10.3390/microorganisms10051008)
Supplement: Supplementary file 1 [file microorganisms-10-01008-s001.zip › Figure S2.pdf]

(3.653.027) **Start** phytochrome-like protein heme oxyg... Epimerase LT 3B family hp transmembrane protein **End** (3.657.999)

gacacaagctgagcgggttcattgccatgcgcgatatgcgaacggttataagaccactataagaccacccacagggcggttaaggcacaccgcagacaccgaccagcaccgcgcctcaga  
ctgtgttcgactcgccaagtacggtacgcgtatacgccttgccaatatctcgtgtgatattctggtgggtgtccgcgcattccgtgtggcgctctgtggctggtcgtggcgggcgaggtct

35  
Asp Thr Ser  
XaFJ1\_GM003153

Leu  
XaFJ1\_GM003154

gtggcgcgaccgcgattgtctgctgcagcacgtggcgggcgcccggtgccagttcgatcacctccgggtccggcggttgccggctccaggcacacgaactggcaccagtggtggtcccacgt  
caccgcgctggcgctaacagacgagctcgtgcaccgcgccggggccacggtcaagctagtggaggccaggccgcaaacggcgagggtccgtgtgcttgaccgtggtcaccctagggtgca

285 280 275 270 265 260 255 250  
Pro Ala Val Ala Ile Thr Gln Gln Leu Val His Arg Ala Gly Pro Ala Leu Glu Ile Val Glu Pro Gly Ala Asn Ala Pro Glu Leu Cys Val Phe Gln Cys Trp His Ser Gly Val Asp  
XaFJ1\_GM003154

cgaccatcgctgggccccggcttcgccccgattccacgccaccagggtgcggctgccgctgctagcgagatgaatccgacgctgcaggccccggatcgagcagggtgtagcgggcccg  
gctggttagcgaccccggggcccgaagcgggcctaagggtcggttggtcccacgcgcagcgcgacgatcgctctacttaggctgcgacgtccgggcctagctcgtcccacatcgccggcgcc

245 240 235 230 225 220 215 210  
Val Met Ala His Ala Gly Ala Glu Gly Pro Asn Trp Ala Val Leu Thr Arg Ser Gly Ser Ser Ala Leu His Ile Arg Arg Gln Leu Gly Pro Asp Leu Leu Thr Tyr Arg Gly Gly Ala  
XaFJ1\_GM003154

catcgatgtagatgcggtcgctacggcctggatcgcgggatcctgcaagggtccaatgcacctgctgacgatgcaccgtggcgtagccgtcgaacttgtccaggtaatcgagcccgcca  
gtagctacatctacgccagcgatgccggacctagcgcgcctaggacgttccaggttagcgggacgactgctacgtggcaccgcacatcggcagcttgaacaggtccattagctcgggcaggt

205 200 195 190 185 180 175 170  
Asp Ile Tyr Ile Arg Asp Ser Arg Gly Pro Asp Arg Pro Asp Gln Leu Thr Trp Asp Gly Gln Gln Arg His Val Thr Ala Tyr Gly Asp Phe Lys Asp Leu Tyr Asp Leu Gly Asp Leu  
XaFJ1\_GM003154

ggccctgcacccgcacctgggtggcgctcggaacccgaaaaataattgtgcagggtctgggtgatgcgtgccggagccgtgcgatgttgtcgggtgatcaggcgctgctccaacgtggcgc  
ccgggacgtggcgctggaccaccgcagcgcgttgggcctttattaacacgtcccgaaccactacgcacggcctcggcacggctacaacagccactagtccgcgacgaggttgacccgcg

165 160 155 150 145 140 135 130  
Gly Gln Val Arg Val Gln Thr Ala Asp Ala Val Arg Phe Tyr Asn His Leu Ala Gln Thr Ile Arg Ala Pro Ala Thr Gly Ile Asn Asp Thr Ile Leu Arg Gln Glu Leu Thr Ala Gly  
XaFJ1\_GM003154

cgatccgcagatgcaggcgcaagcgcaatgacagcgctgcagctctagcggttaccaaggtcaagaccaggctaccgtcgccctctcgttgcgcctcctgccactgccactgcaccgtgc  
gctaggcgctctacgtccgcgttcgcgttactgtcgcgcagctgcagatgccatgggtccagttcttggtccgatggcagccggagagcgacgcggaggacggtgacggtgacgtggcagc

125 120 115 110 105 100 95 90  
Ile Arg Leu His Leu Arg Leu Arg Leu Ser Leu Ala Asp Val Asp Leu Pro Trp Leu Thr Leu Val Leu Ser Gly Asp Ala Glu Arg Gln Ala Glu Gln Trp Gln Trp Gln Val Thr Arg  
XaFJ1\_GM003154

gcacgacaccgtgcgcgggtacggcgctcgggtctgaccttggcgaccgaaatacggccagcacaccggcggtgccaccgcggatcggggtcggcgctcggctgcgcactcggcgacaaccaca  
cgtgctgtggcacgcgcccatgccgcagcagactggaaccgctggcctttatgccggctcgtgtggccgcacggtggcgccctagcccagccgacggcagcggtgagccgctgttggtgt

85 80 75 70 65 60 55 50  
Val Val Gly His Ala Pro Val Ala Asp Thr Gln Gly Gln Arg Gly Phe Tyr Pro Trp Cys Val Pro Thr Gly Gly Arg Ile Pro Thr Pro Thr Pro Gln Ala Ser Pro Ser Leu Trp Leu  
XaFJ1\_GM003154

ggacgtcgggtgcgcaccttgggcacgaacgacagaacctgcccgccaaacaggctgatgcgcagcgatggactgcgcctgttccaccagcaacgaaggatagccgtggaatcggctacgc  
cctgcagccacggcggaaccgctgcttgcgtcttggacggcggtttgtccgactagcgtcgttacctgacgcggcacaggtggtcgttgccttccatcggcacctttagccgatgcg

45 40 35 30 25 20 15 10  
Val Asp Thr Gly Gly Lys Pro Val Phe Ser Leu Val Gln Gly Gly Phe Leu Ser Ile Ala Ala Ile Ser Gln Ala Thr Asp Val Leu Leu Ser Pro Tyr Gly His Phe Asp Ala Val Ser  
XaFJ1\_GM003154

tcagaccgaggacgtcggacatgggtcgcgtcctcggtggcgcgctgatgtggacatacccatgctagcgagcgggcgagggagcgccggtggtcgcctttgccgacggatggcgatgacga  
agtcctggctcctgcagcctgtaccgcagctacgagccaccgcgcgactacacctgtatgggtacgatcgctcgcccgctccctcgcgggcaccagcgaacggctgcctaccgctactgct

460 455 450 445 440 435 430 425  
Val Ser Ser Thr Pro Cys Pro Ser Cys Ala Gly His Arg Ala Ser Thr Ser Met Gly Met Ser Ala Leu Pro Arg Pro Leu Ala Thr Thr Ala Lys Gly Val Ser Pro Ser Ser Ser  
LT

5 1  
Leu Gly Leu Val Asp Ser Met  
XaFJ1\_GM003154

atgtcgggttacgggtgcggaaggcgctttggcaggcgctgcgggtgcctcacggcgcaacgcgctcaggatgcgctgcccggcggggccatcgaccggctgcaagcccaaccgttgcgtg  
tacacgcccatgccacgccttcgcgaaaccgtccgcagcgcgccaggaagtgcgcgcttgcgcagctcctacgcgacgggcgcgcggtagctggccgacgttcgggttggcaacgac

420 415 410 405 400 395 390 385  
His Ala Pro Val Pro Ala Ser Pro Ala Lys Ala Pro Thr Ala Pro Ala Glu Arg Leu Ala Asp Leu Ile Arg Gln Gly Ala Arg Gly Asp Val Pro Gln Leu Gly Leu Arg Gln Gln  
LT

ctcagcctggatggcacggcggggtggcggtgccgatcatgccatcggcctggcgatcgcataccgcgcgcgaatagcaaggtctgtagttcgcgcgctccgcgcggccagtcggg  
gagtcggacctaccgtgccgcccaccgccacggctagtacggtagccggacgcgctagcgtatgggcgcgcgggttatcgttcagacatcaagcgcgggcagggcgcgccgggtcaggccc

380 375 370 365 360 355 350 345  
Glu Ala Gln Ile Ala Arg Arg Thr Ala Thr Gly Ile Met Gly Asp Ala Gln Gly Ile Ala Tyr Gly Arg Ala Leu Leu Leu Thr Gln Leu Glu Arg Arg Glu Ala Arg Gly Leu Gly Pro  
LT

atcgtcggtcggccaggcagcgaccagccccgggttgcgcgcaggcggttcggacaacaacgcaatggccagcgcataactttcggcggcgttgttaggcatagatcgcatcgtagttag  
tagcagccagccggctcgtcgtggtcgggcccgaacggcgcgctccgcagccgttgttgcgttaccggtcgcgtattgaaagccgccgaacatccgtatctagcgtagcatcaatgc

340 335 330 325 320 315 310 305  
Asp Asp Thr Pro Trp Ala Ala Val Leu Gly Pro Lys Gly Arg Leu Arg Asp Ser Leu Leu Ala Ile Ala Leu Ala Tyr Ser Glu Ala Ala Asn Tyr Ala Tyr Ile Ala Asp Tyr Asn Arg  
LT

gaacaccaggaacgcggggccatgctgcgcggcgccgcaacagcagcgccgctggcgcttgcgtgccagcgcaggaggggcgcgggccatcgcgggcggtcagcccgcgcgcgccagtc  
cttgtgtccttgccccgggtacgagcgggcgccgcttgcgtcgcggcgacccgcaaacgcagcggtcgcgtccctcccgcgccggtagccgcgcagctcgggctcgcgcggtcag

300 295 290 285 280 275 270 265  
Phe Val Leu Phe Ala Pro Gly His Glu Gly Ala Pro Leu Leu Leu Ala Ala Pro Thr Gln Thr Ala Leu Ala Pro Leu Ala Arg Gly Asp Ala Ala Thr Leu Gly Arg Ala Arg Trp Asp  
LT

cgccagcgccggcggttgcgtgcgccggcgctgcgcggaatcgaaacctgcggcaacttcacctccagccccacggctgtccgctctgccaacggacagcttgaggtagtgcgcggt  
gcggtgcgcggcgcaacgcagcggggccgcacgggcttagcttggcaggcggttgaagtggaggtcgggggtgccgacaggcgagacggttggcctgtcgaactccatcacgcgccca

260 255 250 245 240 235 230 225  
Ala Leu Pro Arg Arg Gln Thr Arg Gly Ala His Ala Ser Asp Phe Gly Asp Pro Leu Lys Val Glu Leu Gly Trp Pro Gln Gly Ser Gln Trp Gly Ser Leu Lys Leu Tyr His Ala Thr  
LT

ggaggccagtgcatcggggagactggcgaccaagtgcggcgggccatcgccatcgccgtccaccgcgatacgcgcgtagggtgctgggcatgaactgggtatggccgaaagcgccctgccca  
cctccggtcacgtagccctctgaccgctggttcagcgccgcggttagcgttagccgaggtggcgctatgcgcgcacatccagaccgctacttgaccataccggcttccgggacgggt

220 215 210 205 200 195 190 185  
Ser Ala Leu Ala Asp Pro Leu Ser Ala Val Leu Asp Arg Gly Asp Gly Asp Val Ala Ile Arg Ala Thr Ser Pro Met Phe Gln Thr His Gly Phe Ala Gly Ala Trp  
LT

ggagccggtcagcccttcgggcttttagatcgccgggttcgcagcagcttcaacaacgcgaacagttcccgcgaaagaacggctgacggcgggcggttgcacgccaaggtcaacagcgacac  
cctcggccagtcgggaagcccgaatctagcggccgaacgtcgtcgaagttgttgcgcttgcgaagcggcgtttcttgcgcgactgcccgccgaacgtgcgggtccagttgtcgtcgtgt

180 175 170 165 160 155 150 145  
Ser Gly Thr Leu Gly Glu Pro Lys Leu Asp Gly Ala Gln Leu Leu Lys Leu Leu Ala Phe Leu Glu Gly Arg Phe Phe Pro Gln Arg Gly Asn Cys Ala Leu Thr Leu Leu Ser Val  
LT

caacaatggacgtttgccgctgctgcgaccgtaatcgctctccacgccccacaccgcgaccaccgctctgcgcacccacgcggtattgctgcgccacgtgcgcgagcagatcgcggtgggc  
gttgttacctgcaaaacgggcacgacgctggcattagcgagaggtgcggggtgtggcgctggtggcagacgcgtagggtgcgcgataacgacgcggtgcacgcgctcgtctagccaccgcg

140 135 130 125 120 115 110 105  
Leu Leu Pro Arg Lys Gly Thr Ser Arg Gly Tyr Asp Ser Glu Val Gly Trp Val Ala Val Val Thr Gln Ala Asp Val Gly Tyr Gln Gln Ala Val His Ala Leu Leu Asp Arg His Ala  
LT

gctcagcatcgcacgaccatcgctgatcggttgggtatcgaccaagccggccagataatccagatcgcgctggtgaactcgggttgcgcacaaaggagcggttaacacgctcatgtccgg  
cgagtcgtagcgtgctggttagcagctacgaacccatagctggttcggccggtctattagggtctagccgcaccacttgagcccaacgcgtagtctcctcgccattgtgcgagtacagggcc

100 95 90 85 80 75 70 65  
Ser Leu Met Ala Arg Gly Asp Asp Ile Arg Gln Thr Asp Val Leu Gly Ala Leu Tyr Asp Trp Ile Pro Thr Thr Phe Glu Pro Gln Ala Asp Leu Leu Pro Leu Val Ser Met Asp Pro  
LT

ttgcaggccggcggtgaagcgatcgaaagccgctgctgtcaccccatttttgcggcgggcggtgcgcaggcccgcgacgcaggtggcggaaggccgggtccactgccgatgcactggcgga  
aacgtccggccgaccttcgctagcttccggcgacgacagtggggtaaaaacggcccgccacgcgtccgggctgcgtccaccgcttccggccagggtgacggctacgtgaccgcct

60 55 50 45 40 35 30 25  
Gln Leu Gly Ala Thr Phe Arg Asp Phe Ala Ala Ala Thr Val Gly Asn Lys Gly Ala Ala Thr Arg Leu Gly Ala Val Cys Thr Ala Phe Ala Pro Asp Val Ala Ser Ala Ser Ala Ser  
LT

cgcgccggacggggttgcgcgatggcacacggcaccacgcacgcaagggcccaagcgaaacgcagcatcgaaacttctctgccgacaaacaggccgcacatcataaacaaccgcacatcgca  
gcgcgcctgccccaaacgcgtaccgtgtgcgctgggtgcgtgtcgttccgggttcgcttgcgtgtagcttgaaggagcggtgtgtgccggcggtgtagtatttgttggcgtagcgt

20 15 10 5 1  
Ala Ala Ser Pro Thr Gln Ala Ile Ala Cys Pro Val Val Cys Leu Leu Ala Trp Ala Phe Arg Leu Met  
LT
