# Supplementary material for: XAC4296 Is a Multifunctional and Exclusive Xanthomonadaceae Gene Containing a Fusion of Lytic Transglycosylase and Epimerase Domains
Source: Microorganisms. 2022 May 11;10(5):1008. doi: 10.3390/microorganisms10051008 (PMC9143381; doi:10.3390/microorganisms10051008)
Supplement: Supplementary file 1 [file microorganisms-10-01008-s001.zip › Figure S4.pdf]

**A***X. citri*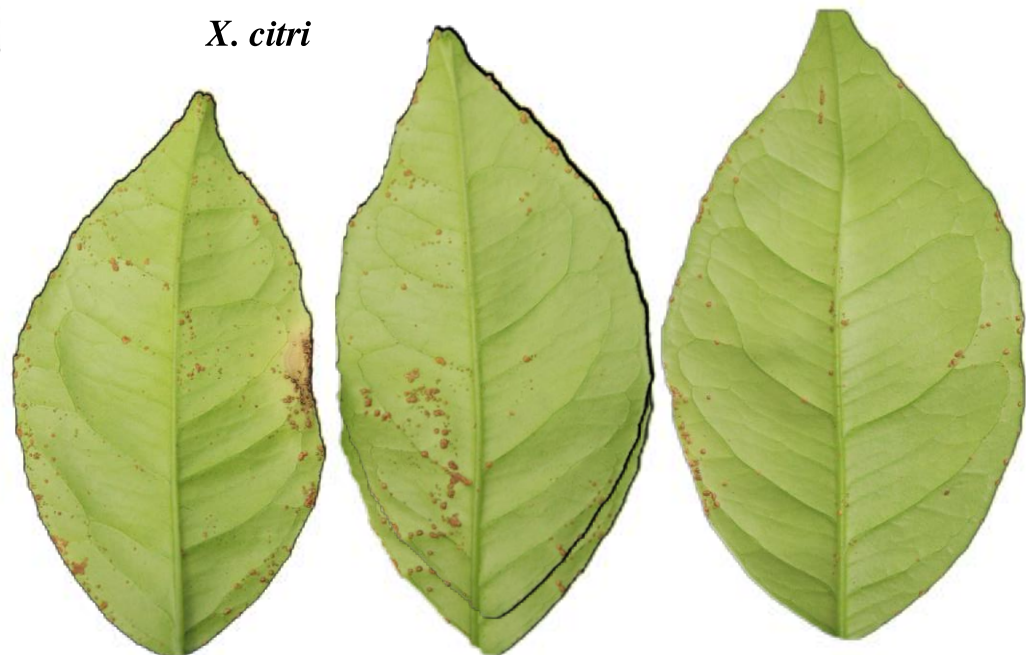 $\Delta 4296$ 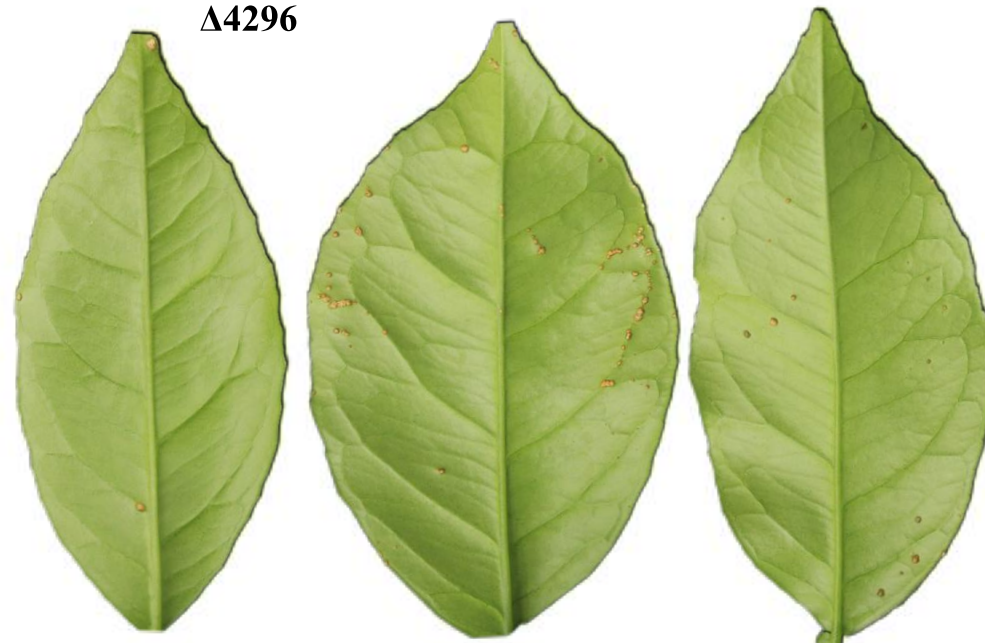**B**

Control

Control

Control

Control

Control

Control

 $\Delta 4296c$  $\Delta 4296c$  $\Delta 4296c$  $\Delta 4296c$  $\Delta 4296c$  $\Delta 4296c$  $\Delta 4296$  $\Delta 4296$  $\Delta 4296$  $\Delta 4296$  $\Delta 4296$  $\Delta 4296$ *X. citri**X. citri**X. citri**X. citri**X. citri**X. citri*

"Galego" acid lime

"Pêra Rio" orange

"Ponkan" orange variety
