# Supplementary material for: XAC4296 Is a Multifunctional and Exclusive Xanthomonadaceae Gene Containing a Fusion of Lytic Transglycosylase and Epimerase Domains
Source: Microorganisms. 2022 May 11;10(5):1008. doi: 10.3390/microorganisms10051008 (PMC9143381; doi:10.3390/microorganisms10051008)
Supplement: Supplementary file 1 [file microorganisms-10-01008-s001.zip › Table S1.pdf]

**Table S1.** Xanthomonadaceae used for comparative genomics. In this table, there are 2 species for the *Pseudoxanthomonas* genus, 36 species for the *Stenotrophomonas* genus, and 270 species for the *Xanthomonas* genus.

| Genus                    | Species                                                        | Accession number |
|--------------------------|----------------------------------------------------------------|------------------|
| <i>Pseudoxanthomonas</i> | <i>Pseudoxanthomonas</i> sp. isolate SSD1                      | CP059266.1       |
|                          | <i>Pseudoxanthomonas</i> suwonensis strain J1                  | CP011144.1       |
| <i>Stenotrophomonas</i>  | <i>Stenotrophomonas maltophilia</i> ZT1                        | CP019797.1       |
|                          | <i>Stenotrophomonas acidaminiphila</i> strain T0-18            | CP043567.1       |
|                          | <i>Stenotrophomonas acidaminiphila</i> strain T25-65           | CP043570.1       |
|                          | <i>Stenotrophomonas acidaminiphila</i> strain ZAC14D2_NAIMI4_2 | CP012900.1       |
|                          | <i>Stenotrophomonas indicatrix</i> strain DAIF1                | CP037883.1       |
|                          | <i>Stenotrophomonas maltophilia</i> strain AA1                 | CP018756.1       |
|                          | <i>Stenotrophomonas maltophilia</i> strain MER1                | CP049368.1       |
|                          | <i>Stenotrophomonas maltophilia</i> strain PEG-305             | CP040437.1       |
|                          | <i>Stenotrophomonas maltophilia</i> strain PEG-390             | CP040436.1       |
|                          | <i>Stenotrophomonas maltophilia</i> strain CPBW01              | CP047310.1       |
|                          | <i>Stenotrophomonas maltophilia</i> strain ISMMS2R             | CP011306.1       |
|                          | <i>Stenotrophomonas maltophilia</i> strain ISMMS2              | CP011305.1       |
|                          | <i>Stenotrophomonas</i> sp. MYb57                              | CP023271.1       |
|                          | <i>Stenotrophomonas</i> sp. NA06056                            | CP054931.1       |
|                          | <i>Stenotrophomonas</i> sp. SAU14A_NAIMI4_5                    | CP026003.1       |
|                          | <i>Stenotrophomonas</i> sp. 364                                | CP047135.1       |
|                          | <i>Stenotrophomonas</i> sp. CW117                              | CP062156.1       |
|                          | <i>Stenotrophomonas</i> sp. ESTM1D_MKCIP4_1                    | CP026004.1       |
|                          | <i>Stenotrophomonas maltophilia</i> strain U5                  | CP040429.1       |
|                          | <i>Stenotrophomonas nitritireducens</i> strain 2001            | CP016756.1       |
|                          | <i>Stenotrophomonas rhizophila</i> strain DSM14405             | CP007597.1       |
|                          | <i>Stenotrophomonas rhizophila</i> strain JC1                  | CP050062.1       |
|                          | <i>Stenotrophomonas rhizophila</i> strain QL-P4                | CP016294.1       |
|                          | <i>Stenotrophomonas</i> sp. 169                                | CP061204.1       |
|                          | <i>Stenotrophomonas</i> sp. G4                                 | CP031741.1       |
|                          | <i>Stenotrophomonas</i> sp. KCTC 12332 strain YM1              | CP014274.1       |
|                          | <i>Stenotrophomonas</i> sp. LM091                              | CP017483.1       |
|                          | <i>Stenotrophomonas</i> sp. SAU14A_NAIMI4_8                    | CP025999.1       |
|                          | <i>Stenotrophomonas</i> sp. SXG-1                              | CP046588.1       |

|                    |                                                                                  |            |
|--------------------|----------------------------------------------------------------------------------|------------|
|                    | <i>Stenotrophomonas</i> sp. YAU14A_MKIMI4_1                                      | CP025998.1 |
|                    | <i>Stenotrophomonas</i> sp. YAU14D1_LEIMI4_1                                     | CP025997.1 |
|                    | <i>Stenotrophomonas</i> sp. ZAC14A_NAIMI4_1                                      | CP026002.1 |
|                    | <i>Stenotrophomonas</i> sp. ZAC14D1_NAIMI4_1                                     | CP026001.1 |
|                    | <i>Stenotrophomonas</i> sp. ZAC14D1_NAIMI4_6                                     | CP026000.1 |
|                    | <i>Stenotrophomonas</i> sp. ZAC14D2_NAIMI4_6                                     | CP025996.1 |
|                    | <i>Stenotrophomonas</i> sp. ZAC14D2_NAIMI4_7                                     | CP025995.1 |
| <i>Xanthomonas</i> | <i>Xanthomonas arboricola</i> pv. <i>juglandis</i> isolate 3                     | LR861807.1 |
|                    | <i>Xanthomonas arboricola</i> pv. <i>juglandis</i> strain Xaj 417                | CP012251.1 |
|                    | <i>Xanthomonas arboricola</i> pv. <i>pruni</i> strain 15-088                     | CP044334.1 |
|                    | <i>Xanthomonas arboricola</i> strain 17                                          | CP011256.1 |
|                    | <i>Xanthomonas axonopodis</i> Xac29-1                                            | CP004399.1 |
|                    | <i>Xanthomonas axonopodis</i> pv. <i>citri</i> str. 306                          | AE008923.1 |
|                    | <i>Xanthomonas axonopodis</i> pv. <i>citrumelo</i> F1                            | CP002914.1 |
|                    | <i>Xanthomonas axonopodis</i> pv. <i>commiphoreae</i> strain LMG26789            | CP031059.1 |
|                    | <i>Xanthomonas phaseoli</i> pv. <i>dieffenbachiae</i> LMG 695                    | CP014347.1 |
|                    | <i>Xanthomonas axonopodis</i> pv. <i>phaseoli</i> strain CFBP412                 | CP020964.1 |
|                    | <i>Xanthomonas citri</i> pv. <i>malvacearum</i> strain HD-1                      | CP046019.1 |
|                    | <i>Xanthomonas citri</i> pv. <i>malvacearum</i> strain MS14003                   | CP023159.1 |
|                    | <i>Xanthomonas citri</i> pv. <i>malvacearum</i> strain MSCT                      | CP017020.1 |
|                    | <i>Xanthomonas citri</i> pv. <i>malvacearum</i> strain XcmH1005                  | CP013004.1 |
|                    | <i>Xanthomonas citri</i> pv. <i>malvacearum</i> strain XcmN1003                  | CP013006.1 |
|                    | <i>Xanthomonas citri</i> pv. <i>phaseoli</i> var. <i>fuscans</i> strain CFBP4885 | CP020992.1 |
|                    | <i>Xanthomonas citri</i> pv. <i>phaseoli</i> var. <i>fuscans</i> strain CFBP6165 | CP020998.1 |
|                    | <i>Xanthomonas citri</i> pv. <i>phaseoli</i> var. <i>fuscans</i> strain CFBP6166 | CP021001.1 |
|                    | <i>Xanthomonas citri</i> pv. <i>phaseoli</i> var. <i>fuscans</i> strain CFBP6167 | CP021018.1 |
|                    | <i>Xanthomonas citri</i> pv. <i>phaseoli</i> var. <i>fuscans</i> strain CFBP6975 | CP021006.1 |
|                    | <i>Xanthomonas oryzae</i> pv. <i>oryzae</i> PXO86                                | CP007166.1 |
|                    | <i>Xanthomonas oryzae</i> pv. <i>oryzae</i> PXO99A                               | CP000967.2 |
|                    | <i>Xanthomonas oryzae</i> pv. <i>oryzae</i> strain AUST2013                      | CP033196.1 |
|                    | <i>Xanthomonas oryzae</i> pv. <i>oryzae</i> strain AXO1947                       | CP013666.1 |
|                    | <i>Xanthomonas oryzae</i> pv. <i>oryzae</i> strain BAI3                          | CP025610.1 |
|                    | <i>Xanthomonas oryzae</i> pv. <i>oryzae</i> strain BXO1                          | CP033201.1 |

|                                                                    |                          |
|--------------------------------------------------------------------|--------------------------|
| <i>Xanthomonas oryzae</i> pv. <i>oryzae</i> strain BXO512          | CP033185.1<br>CP065228.1 |
| <i>Xanthomonas oryzae</i> pv. <i>oryzae</i> strain CFBP1948        |                          |
| <i>Xanthomonas oryzae</i> pv. <i>oryzae</i> strain CFBP1949        | CP033184.1               |
| <i>Xanthomonas oryzae</i> pv. <i>oryzae</i> strain CFBP1951        | CP033183.1               |
| <i>Xanthomonas oryzae</i> pv. <i>oryzae</i> strain Ug11            | CP033170.1               |
| <i>Xanthomonas oryzae</i> pv. <i>oryzae</i> strain XF89b           | CP011532.1               |
| <i>Xanthomonas oryzae</i> pv. <i>oryzae</i> strain K3a             | CP050115.1               |
| <i>Xanthomonas oryzae</i> pv. <i>oryzae</i> strain K3              | CP050114.1               |
| <i>Xanthomonas oryzae</i> pv. <i>oryzae</i> strain KXO85           | CP033197.1               |
| <i>Xanthomonas oryzae</i> pv. <i>oryzae</i> strain MAI1            | CP025609.1               |
| <i>Xanthomonas oryzae</i> pv. <i>oryzae</i> strain MAI68           | CP019085.1               |
| <i>Xanthomonas oryzae</i> pv. <i>oryzae</i> strain MAI73           | CP019086.1               |
| <i>Xanthomonas oryzae</i> pv. <i>oryzae</i> strain MAI95           | CP019087.1               |
| <i>Xanthomonas oryzae</i> pv. <i>oryzae</i> strain MAI99           | CP019088.1               |
| <i>Xanthomonas oryzae</i> pv. <i>oryzae</i> strain XM9             | CP020334.1               |
| <i>Xanthomonas oryzae</i> pv. <i>oryzae</i> strain YC11            | CP031464.1               |
| <i>Xanthomonas oryzae</i> pv. <i>oryzae</i> strain YN24            | CP018089.1               |
| <i>Xanthomonas oryzae</i> pv. <i>oryzicola</i> BLS256              | CP003057.2               |
| <i>Xanthomonas oryzae</i> pv. <i>oryzicola</i> strain 0-9          | CP045912.1               |
| <i>Xanthomonas oryzae</i> pv. <i>oryzicola</i> strain B8-12        | CP011955.1               |
| <i>Xanthomonas oryzae</i> pv. <i>oryzicola</i> strain BLS279       | CP011956.1               |
| <i>Xanthomonas oryzae</i> pv. <i>oryzicola</i> strain BXOR1        | CP011957.1               |
| <i>Xanthomonas oryzae</i> pv. <i>oryzicola</i> strain CFBP2286     | CP011962.1               |
| <i>Xanthomonas oryzae</i> pv. <i>oryzicola</i> strain CFBP7331     | CP011958.1               |
| <i>Xanthomonas translucens</i> pv. <i>undulosa</i> strain Xtu 4699 | CP008714.1               |
| <i>Xanthomonas vasicola</i> pv. <i>arecae</i> strain NCPPB 2649    | CP034653.1               |
| <i>Xanthomonas vasicola</i> pv. <i>vasculorum</i> strain SAM119    | CP028127.1               |
| <i>Xanthomonas vasicola</i> pv. <i>vasculorum</i> strain Xv1601    | CP025272.1               |
| <i>Xanthomonas vasicola</i> strain NCPPB 902                       | CP034657.1               |
| <i>Xanthomonas vasicola</i> strain NCPPB 1060                      | CP034649.1               |
| <i>Xanthomonas vesicatoria</i> ATCC 35937 strain LMG911            | CP018725.1               |
| <i>Xanthomonas vesicatoria</i> strain LM159                        | CP018470.1               |
| <i>Xanthomonas hortorum</i> pv. <i>vitians</i> LM16734             | CP060399.1               |
| <i>Xanthomonas hortorum</i> pv. <i>vitians</i> strain CFBP 498     | LR828257.1               |
| <i>Xanthomonas axonopodis</i> pv. <i>phaseoli</i> strain CFBP6164  | CP020967.1               |
| <i>Xanthomonas axonopodis</i> pv. <i>phaseoli</i> strain CFBP6546R | CP020971.1               |
| <i>Xanthomonas axonopodis</i> pv. <i>phaseoli</i> strain           | CP020975.1               |

|                                                                                             |            |
|---------------------------------------------------------------------------------------------|------------|
| CFBP6982                                                                                    |            |
| <i>Xanthomonas axonopodis</i> pv. <i>phaseoli</i> strain ISO18C2                            | CP012048.1 |
| <i>Xanthomonas axonopodis</i> pv. <i>phaseoli</i> strain ISO18C8                            | CP012063.1 |
| <i>Xanthomonas phaseoli</i> pv. <i>phaseoli</i> strain ISO98C12                             | CP012057.1 |
| <i>Xanthomonas axonopodis</i> pv. <i>vasculorum</i> strain NCPPB 796                        | CP053649.1 |
| <i>Xanthomonas campestris</i> pv. <i>badrii</i> strain NEB122                               | CP051651.1 |
| <i>Xanthomonas campestris</i> pv. <i>campestris</i> MAFF106712                              | AP019682.1 |
| <i>Xanthomonas campestris</i> pv. <i>campestris</i> MAFF302021                              | AP019684.1 |
| <i>Xanthomonas campestris</i> pv. <i>campestris</i> complete genome, strain B100            | AM920689.1 |
| <i>Xanthomonas campestris</i> pv. <i>campestris</i> strain 17                               | CP011946.1 |
| <i>Xanthomonas campestris</i> pv. <i>campestris</i> strain 3811                             | CP025750.1 |
| <i>Xanthomonas campestris</i> pv. <i>campestris</i> strain ICMP 4013                        | CP012146.1 |
| <i>Xanthomonas campestris</i> pv. <i>campestris</i> strain ICMP 21080                       | CP012145.1 |
| <i>Xanthomonas campestris</i> pv. <i>campestris</i> strain Xcc8004_Xcc1                     | CP029483.1 |
| <i>Xanthomonas campestris</i> pv. <i>campestris</i> strain Xcc8004_Xcc2                     | CP029484.1 |
| <i>Xanthomonas citri</i> pv. <i>phaseoli</i> var. <i>fuscans</i> strain CFBP6988R           | CP020979.1 |
| <i>Xanthomonas citri</i> pv. <i>phaseoli</i> var. <i>fuscans</i> strain CFBP6989 CP020981.1 | CP020981.1 |
| <i>Xanthomonas citri</i> pv. <i>phaseoli</i> var. <i>fuscans</i> strain CFBP6990            | CP020983.1 |
| <i>Xanthomonas citri</i> pv. <i>phaseoli</i> var. <i>fuscans</i> strain CFBP6991            | CP021015.1 |
| <i>Xanthomonas citri</i> pv. <i>phaseoli</i> var. <i>fuscans</i> strain CFBP6992            | CP020985.1 |
| <i>Xanthomonas citri</i> pv. <i>phaseoli</i> var. <i>fuscans</i> strain CFBP6994R           | CP020987.1 |
| <i>Xanthomonas citri</i> pv. <i>phaseoli</i> var. <i>fuscans</i> strain CFBP6996R           | CP020989.1 |
| <i>Xanthomonas citri</i> pv. <i>punicae</i> strain BD0022                                   | CP030159.1 |
| <i>Xanthomonas citri</i> pv. <i>punicae</i> strain BD0023                                   | CP030161.1 |
| <i>Xanthomonas citri</i> pv. <i>punicae</i> strain BD0025                                   | CP030169.1 |
| <i>Xanthomonas citri</i> pv. <i>punicae</i> strain LMG7439                                  | CP030164.1 |
| <i>Xanthomonas citri</i> pv. <i>punicae</i> strain LMG7504                                  | CP030166.1 |
| <i>Xanthomonas citri</i> pv. <i>punicae</i> strain LMG 859                                  | CP030178.1 |
| <i>Xanthomonas citri</i> pv. <i>punicae</i> strain NCPPB 3563                               | CP030163.1 |
| <i>Xanthomonas citri</i> pv. <i>vignicola</i> strain CFBP7111                               | CP022263.1 |
| <i>Xanthomonas citri</i> pv. <i>vignicola</i> strain CFBP7112                               | CP022267.1 |
| <i>Xanthomonas citri</i> pv. <i>vignicola</i> strain CFBP7113                               | CP022270.1 |
| <i>Xanthomonas oryzae</i> pv. <i>oryzae</i> strain CFBP1952                                 | CP033182.1 |

|                                                                |            |
|----------------------------------------------------------------|------------|
| <i>Xanthomonas oryzae</i> pv. <i>oryzae</i> strain CFBP7319    | CP033181.1 |
| <i>Xanthomonas oryzae</i> pv. <i>oryzae</i> strain CFBP7320    | CP033186.1 |
| <i>Xanthomonas oryzae</i> pv. <i>oryzae</i> strain CFBP7321    | CP033180.1 |
| <i>Xanthomonas oryzae</i> pv. <i>oryzae</i> strain CFBP7322    | CP033179.1 |
| <i>Xanthomonas oryzae</i> pv. <i>oryzae</i> strain CFBP7323    | CP033178.1 |
| <i>Xanthomonas oryzae</i> pv. <i>oryzae</i> strain CFBP7324    | CP033177.1 |
| <i>Xanthomonas oryzae</i> pv. <i>oryzae</i> strain CFBP7325    | CP033176.1 |
| <i>Xanthomonas oryzae</i> pv. <i>oryzae</i> strain CFBP7337    | CP033175.1 |
| <i>Xanthomonas oryzae</i> pv. <i>oryzae</i> strain CFBP7340    | CP033174.1 |
| <i>Xanthomonas oryzae</i> pv. <i>oryzae</i> strain CFBP8172    | CP033173.1 |
| <i>Xanthomonas oryzae</i> pv. <i>oryzae</i> strain CIAT        | CP033194.1 |
| <i>Xanthomonas oryzae</i> pv. <i>oryzae</i> strain CIX298      | CP036378.1 |
| <i>Xanthomonas oryzae</i> pv. <i>oryzae</i> strain CIX2374     | CP036377.1 |
| <i>Xanthomonas oryzae</i> pv. <i>oryzae</i> strain Dak16       | CP033172.1 |
| <i>Xanthomonas oryzae</i> pv. <i>oryzae</i> strain HuN37       | CP031456.1 |
| <i>Xanthomonas oryzae</i> pv. <i>oryzae</i> strain ICMP3125    | CP031697.1 |
| <i>Xanthomonas oryzae</i> pv. <i>oryzae</i> strain MAI106      | CP019089.1 |
| <i>Xanthomonas oryzae</i> pv. <i>oryzae</i> strain MAI129      | CP019090.1 |
| <i>Xanthomonas oryzae</i> pv. <i>oryzae</i> strain MAI134      | CP019091.1 |
| <i>Xanthomonas oryzae</i> pv. <i>oryzae</i> strain MAI145      | CP019092.1 |
| <i>Xanthomonas oryzae</i> pv. <i>oryzae</i> strain NX0260      | CP033192.1 |
| <i>Xanthomonas oryzae</i> pv. <i>oryzae</i> strain OS198       | CP031461.1 |
| <i>Xanthomonas oryzae</i> pv. <i>oryzae</i> strain PX079       | CP031462.1 |
| <i>Xanthomonas oryzae</i> pv. <i>oryzae</i> strain PX086       | CP031463.1 |
| <i>Xanthomonas oryzae</i> pv. <i>oryzae</i> strain PXO61       | CP020942.1 |
| <i>Xanthomonas oryzae</i> pv. <i>oryzae</i> strain PXO61       | CP021788.1 |
| <i>Xanthomonas oryzae</i> pv. <i>oryzae</i> strain PXO61       | CP021789.1 |
| <i>Xanthomonas oryzae</i> pv. <i>oryzae</i> strain PXO61       | CP033187.3 |
| <i>Xanthomonas oryzae</i> pv. <i>oryzae</i> strain PXO71       | CP013670.1 |
| <i>Xanthomonas oryzae</i> pv. <i>oryzae</i> strain PXO83       | CP012947.1 |
| <i>Xanthomonas oryzae</i> pv. <i>oryzae</i> strain PXO142      | CP031698.1 |
| <i>Xanthomonas oryzae</i> pv. <i>oryzae</i> strain PXO145      | CP013961.1 |
| <i>Xanthomonas oryzae</i> pv. <i>oryzae</i> strain PXO211      | CP013674.1 |
| <i>Xanthomonas oryzae</i> pv. <i>oryzicola</i> strain CFBP7341 | CP011959.1 |
| <i>Xanthomonas oryzae</i> pv. <i>oryzicola</i> strain CFBP7342 | CP007221.1 |
| <i>Xanthomonas oryzae</i> pv. <i>oryzicola</i> strain GX01     | CP043403.1 |
| <i>Xanthomonas oryzae</i> pv. <i>oryzicola</i> strain L8       | CP011960.1 |
| <i>Xanthomonas oryzae</i> pv. <i>oryzicola</i> strain RS105    | CP011961.1 |
| <i>Xanthomonas oryzae</i> pv. <i>oryzicola</i> strain YM15     | CP007810.1 |
| <i>Xanthomonas oryzae</i> strain BAI23                         | CP036256.1 |
| <i>Xanthomonas oryzae</i> strain BB151-3                       | CP036255.1 |
| <i>Xanthomonas oryzae</i> strain BB156-2                       | CP036254.1 |
| <i>Xanthomonas oryzae</i> strain NCPPB 4346                    | CP036253.1 |
| <i>Xanthomonas oryzae</i> strain NJ611                         | CP036252.1 |
| <i>Xanthomonas oryzae</i> strain X11-5A                        | CP036251.1 |
| <i>Xanthomonas perforans</i> 91-118                            | CP019725.1 |
| <i>Xanthomonas perforans</i> strain LH3                        | CP018475.1 |

|                                                                     |            |
|---------------------------------------------------------------------|------------|
| <i>Xanthomonas sacchari</i> strain R1                               | CP010409.1 |
| <i>Xanthomonas</i> sp. CPBF 367 isolate 1                           | LR861803.1 |
| <i>Xanthomonas</i> sp. CPBF 426                                     | LR861805.1 |
| <i>Xanthomonas hortorum</i> strain B07-007                          | CP016878.1 |
| <i>Xanthomonas hortorum</i> strain VT106                            | CP031607.1 |
| <i>Xanthomonas hyacinthi</i> strain CFBP 1156                       | CP043476.1 |
| <i>Xanthomonas oryzae</i> pv. <i>oryzae</i> KACC 10331              | AE013598.1 |
| <i>Xanthomonas oryzae</i> pv. <i>oryzae</i> MAFF 311018             | AP008229.1 |
| <i>Xanthomonas oryzae</i> pv. <i>oryzae</i> strain PXO524           | CP013677.1 |
| <i>Xanthomonas oryzae</i> pv. <i>oryzae</i> strain PXO563           | CP013678.1 |
| <i>Xanthomonas oryzae</i> pv. <i>oryzae</i> strain PXO602           | CP013679.1 |
| <i>Xanthomonas oryzae</i> pv. <i>oryzae</i> strain SK2-3            | CP019515.1 |
| <i>Xanthomonas oryzae</i> pv. <i>oryzae</i> strain ScYc-b           | CP018087.1 |
| <i>Xanthomonas oryzae</i> pv. <i>oryzae</i> strain ScYc-b           | CP031469.1 |
| <i>Xanthomonas oryzae</i> pv. <i>oryzae</i> strain T19              | CP033171.1 |
| <i>Xanthomonas oryzae</i> pv. <i>oryzae</i> strain PXO364           | CP033191.1 |
| <i>Xanthomonas oryzae</i> pv. <i>oryzae</i> strain PXO404           | CP033190.1 |
| <i>Xanthomonas oryzae</i> pv. <i>oryzae</i> strain PXO421           | CP033189.1 |
| <i>Xanthomonas oryzae</i> pv. <i>oryzae</i> strain PXO513           | CP033188.1 |
| <i>Xanthomonas citri</i> pv. <i>malvacearum</i> strain AR81009      | CP023155.1 |
| <i>Xanthomonas campestris</i> pv. <i>campestris</i> str. ATCC 33913 | AE008922.1 |
| <i>Xanthomonas campestris</i> pv. <i>campestris</i> str. CN03       | CP017308.1 |
| <i>Xanthomonas campestris</i> pv. <i>campestris</i> str. CN12       | CP017310.1 |
| <i>Xanthomonas campestris</i> pv. <i>campestris</i> str. CN14       | CP017317.1 |
| <i>Xanthomonas campestris</i> pv. <i>campestris</i> str. CN15       | CP017323.1 |
| <i>Xanthomonas campestris</i> pv. <i>campestris</i> str. CN16       | CP017389.1 |
| <i>Xanthomonas campestris</i> pv. <i>campestris</i> str. CN17       | CP017307.1 |
| <i>Xanthomonas campestris</i> pv. <i>campestris</i> str. CN18       | CP017319.1 |
| <i>Xanthomonas campestris</i> pv. <i>musacearum</i> NCPPB 4379      | CP034655.1 |
| <i>Xanthomonas campestris</i> pv. <i>raphani</i> 756C               | CP002789.1 |
| <i>Xanthomonas campestris</i> pv. <i>raphani</i> strain MAFF106181  | CP058243.1 |
| <i>Xanthomonas campestris</i> pv. <i>vesicatoria</i>                | AM039952.1 |
| <i>Xanthomonas campestris</i> pv. <i>vesicatoria</i> str. 85-10     | CP017190.1 |
| <i>Xanthomonas campestris</i> strain M28                            | CP062066.1 |
| <i>Xanthomonas citri</i> pv. <i>anacardii</i> CFBP 2913             | CP024057.1 |
| <i>Xanthomonas citri</i> pv. <i>citri</i> strain 03-1638-1-1        | CP023285.1 |
| <i>Xanthomonas citri</i> pv. <i>citri</i> strain DAR72029           | CP060446.1 |
| <i>Xanthomonas citri</i> pv. <i>citri</i> strain DAR73886           | CP060465.1 |
| <i>Xanthomonas citri</i> strain UnB-Xtec2D                          | CP048044.1 |
| <i>Xanthomonas citri</i> strain UnB-XtecTG02-2                      | CP048712.1 |
| <i>Xanthomonas citri</i> subsp. <i>citri</i> A306                   | CP006857.1 |
| <i>Xanthomonas citri</i> subsp. <i>citri</i> Aw12879                | CP003778.1 |
| <i>Xanthomonas citri</i> subsp. <i>citri</i> UI6                    | CP008992.1 |
| <i>Xanthomonas citri</i> subsp. <i>citri</i> strain 5208            | CP009028.1 |
| <i>Xanthomonas citri</i> subsp. <i>citri</i> strain AW13            | CP009031.1 |

|                                                                    |            |
|--------------------------------------------------------------------|------------|
| <i>Xanthomonas citri</i> subsp. <i>citri</i> strain AW14           | CP009034.1 |
| <i>Xanthomonas citri</i> subsp. <i>citri</i> strain AW15           | CP009037.1 |
| <i>Xanthomonas citri</i> subsp. <i>citri</i> strain AW16           | CP009040.1 |
| <i>Xanthomonas citri</i> subsp. <i>citri</i> strain BL18           | CP009025.1 |
| <i>Xanthomonas citri</i> subsp. <i>citri</i> strain FB19           | CP009022.1 |
| <i>Xanthomonas citri</i> subsp. <i>citri</i> strain MN10           | CP009004.1 |
| <i>Xanthomonas citri</i> subsp. <i>citri</i> strain MN11           | CP009001.1 |
| <i>Xanthomonas citri</i> subsp. <i>citri</i> strain MN12           | CP008998.1 |
| <i>Xanthomonas citri</i> subsp. <i>citri</i> strain NT17           | CP008995.1 |
| <i>Xanthomonas citri</i> subsp. <i>citri</i> strain UI7            | CP008989.1 |
| <i>Xanthomonas citri</i> subsp. <i>citri</i> strain gd2            | CP009019.1 |
| <i>Xanthomonas oryzae</i> pv. <i>oryzae</i> strain ITCCBB0002      | CP046148.1 |
| <i>Xanthomonas oryzae</i> pv. <i>oryzae</i> strain IXO704          | CP040604.1 |
| <i>Xanthomonas oryzae</i> pv. <i>oryzae</i> strain IXO1088         | CP040687.1 |
| <i>Xanthomonas oryzae</i> pv. <i>oryzae</i> strain IX-280          | CP019226.1 |
| <i>Xanthomonas oryzae</i> pv. <i>oryzae</i> strain JL25            | CP031457.1 |
| <i>Xanthomonas oryzae</i> pv. <i>oryzae</i> strain JL28            | CP031458.1 |
| <i>Xanthomonas oryzae</i> pv. <i>oryzae</i> strain JL33            | CP031459.1 |
| <i>Xanthomonas oryzae</i> pv. <i>oryzae</i> strain JP01            | CP031460.1 |
| <i>Xanthomonas oryzae</i> pv. <i>oryzae</i> strain JW11089         | CP033193.2 |
| <i>Xanthomonas oryzae</i> pv. <i>oryzae</i> strain K1              | CP049205.1 |
| <i>Xanthomonas oryzae</i> pv. <i>oryzae</i> strain K2              | CP050113.1 |
| <i>Xanthomonas citri</i> subsp. <i>citri</i> strain gd3            | CP009016.1 |
| <i>Xanthomonas citri</i> subsp. <i>citri</i> strain jx4            | CP009013.1 |
| <i>Xanthomonas citri</i> subsp. <i>citri</i> strain jx5            | CP009010.1 |
| <i>Xanthomonas citri</i> pv. <i>citri</i> strain DAR73889          | CP060470.1 |
| <i>Xanthomonas citri</i> pv. <i>citri</i> strain DAR73910          | CP060476.1 |
| <i>Xanthomonas citri</i> pv. <i>citri</i> strain DAR84832          | CP060460.1 |
| <i>Xanthomonas citri</i> pv. <i>glycines</i> strain 1018           | CP041961.1 |
| <i>Xanthomonas oryzae</i> pv. <i>oryzae</i> strain PXO236          | CP013675.1 |
| <i>Xanthomonas oryzae</i> pv. <i>oryzae</i> strain PXO282          | CP013676.1 |
| <i>Xanthomonas hortorum</i> pv. <i>gardneri</i> strain JS749-3     | CP018728.1 |
| <i>Xanthomonas hortorum</i> pv. <i>pelargonii</i> strain CFBP 2533 | LR828261.1 |
| <i>Xanthomonas citri</i> pv. <i>citri</i> strain LH201             | CP018858.1 |
| <i>Xanthomonas citri</i> pv. <i>citri</i> strain LH276             | CP018854.1 |
| <i>Xanthomonas citri</i> pv. <i>citri</i> strain LJ207-7           | CP018850.1 |
| <i>Xanthomonas citri</i> pv. <i>citri</i> strain LL074-4           | CP018847.1 |
| <i>Xanthomonas citri</i> pv. <i>citri</i> strain TX160042          | CP020882.1 |
| <i>Xanthomonas citri</i> pv. <i>citri</i> strain TX160149          | CP020885.1 |
| <i>Xanthomonas citri</i> pv. <i>citri</i> strain TX160197          | CP020889.1 |
| <i>Xanthomonas citri</i> pv. <i>citri</i> strain Xcc29-1           | CP023661.1 |
| <i>Xanthomonas citri</i> pv. <i>citri</i> strain Xcc49             | CP023662.1 |
| <i>Xanthomonas citri</i> pv. <i>citri</i> strain jx-6              | CP011827.2 |
| <i>Xanthomonas citri</i> pv. <i>fuscans</i> CFBP 6988              | CP026331.1 |
| <i>Xanthomonas citri</i> pv. <i>fuscans</i> strain Xff49           | CP023294.1 |
| <i>Xanthomonas citri</i> pv. <i>glycines</i> strain 8ra            | CP041781.1 |
| <i>Xanthomonas citri</i> pv. <i>fuscans</i> strain ISO118C5        | CP012051.1 |
| <i>Xanthomonas</i> sp. GW                                          | CP051189.1 |

|                                                                               |            |
|-------------------------------------------------------------------------------|------------|
| <i>Xanthomonas</i> sp. ISO98C4                                                | CP012060.1 |
| <i>Xanthomonas</i> sp. SI                                                     | CP051261.1 |
| <i>Xanthomonas</i> sp. SS                                                     | CP051190.1 |
| <i>Xanthomonas</i> sp. WG16                                                   | CP062255.1 |
| <i>Xanthomonas translucens</i> pv. <i>cerealis</i> strain 01                  | CP038228.1 |
| <i>Xanthomonas translucens</i> pv. <i>translucens</i> DSM 18974 isolate peng1 | LT604072.1 |
| <i>Xanthomonas translucens</i> pv. <i>undulosa</i> strain ICMP11055           | CP009750.1 |
| <i>Xanthomonas translucens</i> pv. <i>undulosa</i> strain LW16                | CP043540.1 |
| <i>Xanthomonas translucens</i> pv. <i>undulosa</i> strain P3                  | CP043500.1 |
| <i>Xanthomonas citri</i> pv. <i>glycines</i> strain K2                        | CP041967.1 |
| <i>Xanthomonas citri</i> pv. <i>glycines</i> str. 8ra                         | CP017188.2 |
| <i>Xanthomonas citri</i> pv. <i>glycines</i> strain 1157                      | CP041963.1 |
| <i>Xanthomonas citri</i> pv. <i>glycines</i> str. 12-2                        | CP015972.1 |
| <i>Xanthomonas arboricola</i> strain SL2098                                   | CP041965.1 |
| <i>Xanthomonas citri</i> pv. <i>glycines</i> strain EB08                      | CP026334.1 |
| <i>Xanthomonas fuscans</i> subsp. <i>fuscans</i> strain ISO118C1              | CP012053.1 |
| <i>Xanthomonas fuscans</i> subsp. <i>fuscans</i> strain ISO12C3               | CP012055.1 |
| <i>Xanthomonas translucens</i> pv. <i>undulosa</i> strain Xtu 4699            | CP008714.1 |
| <i>Xanthomonas vasicola</i> pv. <i>arecae</i> strain NCPPB 2649               | CP034653.1 |
| <i>Xanthomonas vasicola</i> pv. <i>vasculorum</i> strain SAM119               | CP028127.1 |
| <i>Xanthomonas vasicola</i> pv. <i>vasculorum</i> strain Xv1601               | CP025272.1 |
| <i>Xanthomonas vasicola</i> strain NCPPB 902                                  | CP034657.1 |
| <i>Xanthomonas vasicola</i> strain NCPPB 1060                                 | CP034649.1 |
| <i>Xanthomonas vesicatoria</i> ATCC 35937 strain LMG911                       | CP018725.1 |
| <i>Xanthomonas vesicatoria</i> strain LM159                                   | CP018470.1 |
| <i>Xanthomonas hortorum</i> pv. <i>vitians</i> LM16734                        | CP060399.1 |
| <i>Xanthomonas hortorum</i> pv. <i>vitians</i> strain CFBP 498                | LR828257.1 |
| <i>Xanthomonas hortorum</i> strain B07-007                                    | CP016878.1 |
| <i>Xanthomonas hortorum</i> strain VT106                                      | CP031607.1 |
| <i>Xanthomonas hyacinthi</i> strain CFBP 1156                                 | CP043476.1 |
| <i>Xanthomonas oryzae</i> pv. <i>oryzae</i> KACC 10331                        | AE013598.1 |
| <i>Xanthomonas oryzae</i> pv. <i>oryzae</i> MAFF 311018 DNA                   | AP008229.1 |
| <i>Xanthomonas oryzae</i> pv. <i>oryzae</i> strain PXO524                     | CP013677.1 |
| <i>Xanthomonas oryzae</i> pv. <i>oryzae</i> strain PXO563                     | CP013678.1 |
| <i>Xanthomonas oryzae</i> pv. <i>oryzae</i> strain PXO602                     | CP013679.1 |
| <i>Xanthomonas oryzae</i> pv. <i>oryzae</i> strain SK2-3                      | CP019515.1 |
| <i>Xanthomonas oryzae</i> pv. <i>oryzae</i> strain ScYc-b                     | CP018087.1 |
| <i>Xanthomonas oryzae</i> pv. <i>oryzae</i> strain ScYc-b                     | CP031469.1 |
| <i>Xanthomonas oryzae</i> pv. <i>oryzae</i> strain T19                        | CP033171.1 |

|                                                                    |            |
|--------------------------------------------------------------------|------------|
| <i>Xanthomonas oryzae</i> pv. <i>oryzae</i> strain PXO364          | CP033191.1 |
| <i>Xanthomonas oryzae</i> pv. <i>oryzae</i> strain PXO404          | CP033190.1 |
| <i>Xanthomonas oryzae</i> pv. <i>oryzae</i> strain PXO421          | CP033189.1 |
| <i>Xanthomonas oryzae</i> pv. <i>oryzae</i> strain PXO421          | CP033188.1 |
| <i>Xanthomonas citri</i> pv. <i>malvacearum</i> strain AR81009     | CP023155.1 |
| <i>Xanthomonas hortorum</i> pv. <i>gardneri</i> strain ICMP 7383   | CP018731.1 |
| <i>Xanthomonas citri</i> subsp. <i>citri</i> strain mf20           | CP009007.1 |
| <i>Xanthomonas cucurbitae</i> strain ATCC 23378                    | CP033326.1 |
| <i>Xanthomonas cynarae</i> strain CFBP 2044                        | LR828251.1 |
| <i>Xanthomonas euroxanthea</i> CPBF 424                            | LR994544.1 |
| <i>Xanthomonas euvesicatoria</i> strain LMG930                     | CP018467.1 |
| <i>Xanthomonas fragariae</i> isolate Fap21                         | CP016830.1 |
| <i>Xanthomonas fragariae</i> isolate Fap29                         | CP016833.1 |
| <i>Xanthomonas fragariae</i> strain NBC2815                        | LT853880.1 |
| <i>Xanthomonas fragariae</i> strain PD885                          | LT853882.1 |
| <i>Xanthomonas fragariae</i> strain PD5205                         | LT853885.1 |
| <i>Xanthomonas fuscans</i> subsp. <i>fragariae</i> strain 1566     | CP012002.1 |
| <i>Xanthomonas fuscans</i> subsp. <i>fragariae</i> strain FDC 1559 | CP011160.1 |
| <i>Xanthomonas fuscans</i> subsp. <i>fragariae</i> strain FDC 1561 | CP011250.1 |
| <i>Xanthomonas fuscans</i> subsp. <i>fragariae</i> strain FDC 1609 | CP011163.1 |
| <i>Xanthomonas fuscans</i> subsp. <i>fuscans</i> str. 4834-R       | FO681494.1 |
| <i>Xanthomonas gardneri</i> strain CFBP 8129                       | LR828253.1 |
| <i>Xanthomonas hortorum</i> pv. <i>taraxaci</i> strain NCPPB 940   | LR828264.1 |
