# Supplementary material for: XAC4296 Is a Multifunctional and Exclusive Xanthomonadaceae Gene Containing a Fusion of Lytic Transglycosylase and Epimerase Domains
Source: Microorganisms. 2022 May 11;10(5):1008. doi: 10.3390/microorganisms10051008 (PMC9143381; doi:10.3390/microorganisms10051008)
Supplement: Supplementary file 1 [file microorganisms-10-01008-s001.zip › Table S2.pdf]

**Table S2.** List of strains and plasmids used in this study.

| Bacterial strains and plasmids             | Relevant features                                                                                                                                                         | Reference               |
|--------------------------------------------|---------------------------------------------------------------------------------------------------------------------------------------------------------------------------|-------------------------|
| <i>Xanthomonas citri</i> ; <i>X. citri</i> | <i>Xanthomonas citri</i> subsp. <i>citri</i> , wild type strain, citrus pathogen                                                                                          | (Da Silva et al., 2002) |
| Δ4296                                      | <i>X. citri</i> 4296 deletion mutant of <i>X. citri</i>                                                                                                                   | This work               |
| <i>X. citri</i> -p                         | <i>X. citri</i> harboring pMAJIIc                                                                                                                                         |                         |
| Δ4296c                                     | Complemented strain. Δ4296 harboring pMAJIIc-4296; Amp <sup>r</sup> , Kan <sup>r</sup>                                                                                    | This work               |
| <i>E. coli</i> DH10B                       | Δ ( <i>mcrA</i> , <i>mcrBC</i> , <i>mrr</i> , A1 and <i>hsdRMS</i> ), <i>pir</i> <sup>+</sup> , <i>lacZ</i> for screening                                                 | Invitrogen              |
| pNPTS138                                   | Suicide vector, LacZ, Km <sup>r</sup>                                                                                                                                     | Oxford University       |
| pMAJIIc                                    | mCherry expression vector; Ap <sup>r</sup> ; Neo <sup>r</sup> /Km <sup>r</sup> ; <i>araC-para</i> ; <i>amy106-912</i> ; polylinker; integrative vector in <i>X. citri</i> | (Pena et al., 2020)     |
| pMAJIIc-4296                               | Recombinant vector                                                                                                                                                        | This work               |
| pNPTS138-Δ4296                             | Suicide vector, LacZ, Km <sup>r</sup>                                                                                                                                     | This work               |
