# Supplementary material for: XAC4296 Is a Multifunctional and Exclusive Xanthomonadaceae Gene Containing a Fusion of Lytic Transglycosylase and Epimerase Domains
Source: Microorganisms. 2022 May 11;10(5):1008. doi: 10.3390/microorganisms10051008 (PMC9143381; doi:10.3390/microorganisms10051008)
Supplement: Supplementary file 1 [file microorganisms-10-01008-s001.zip › Table S3.pdf]

**Table S3.** Oligonucleotides utilized in this study.

| Oligonucleotide<br>name | Sequence (5'-3')                | Restriction<br>site | Purpose                        |
|-------------------------|---------------------------------|---------------------|--------------------------------|
| A (F)**                 | GCCTTGGCCTGGGCTAGCCTG           | <i>NheI</i> **      | Site-directed mutagenesis      |
| B (R)*                  | TCTGCCACGGAAGGTGCCGTAGGGCG      | ----                | Site-directed mutagenesis      |
| C (R)*                  | CACCGCATGACGTCTGCCACGGAAGGTGC   | ----                | Site-directed mutagenesis      |
| D (F)**                 | GGCAAAGCTTGGGTGCTTCTGGC         | <i>HindIII</i> **   | Site-directed mutagenesis      |
| S (R) *                 | CACGAGGCTTCGCACGCACC            | ----                | Sequencing                     |
| pMAJIIc (F) **          | ATCGCTAGCATGACGCTGTCCCGGGGC     | <i>NheI</i> **      | Complementation/mCherry fusion |
| pMAJIIc (R) **          | GTCACTCGAGCTCGACGCTGATGGTCTGGGT | <i>XhoI</i>         | mCherry fusion                 |
| R4296                   | CACGAGGCTTCGCACGCACC            | -                   | Sequencing                     |
| F4296                   | GGCAAAGCTTGGGTGCTTCTGGC         | -                   | Sequencing                     |

\*F, Forward; R, Reverse. Oligonucleotides synthesized by SIGMA-ALDRICH BRASIL.

\*\* Underlined regions represent added restriction sites;

B/C and R1/F2 oligonucleotides blue sequences are complementary to sequences in red of its pairing primer.
