# Supplementary material for: XAC4296 Is a Multifunctional and Exclusive Xanthomonadaceae Gene Containing a Fusion of Lytic Transglycosylase and Epimerase Domains
Source: Microorganisms. 2022 May 11;10(5):1008. doi: 10.3390/microorganisms10051008 (PMC9143381; doi:10.3390/microorganisms10051008)
Supplement: Supplementary file 1 [file microorganisms-10-01008-s001.zip › Table S4.pdf]

**Table S4.** Live-dead quantification for XccA constructions on rich medium with ampicillin 20 µg/mL.

|                 | Live cells       | Dead cells      | %                 |
|-----------------|------------------|-----------------|-------------------|
| <i>X. citri</i> | 300 <sup>a</sup> | 30 <sup>a</sup> | 10 <sup>a</sup>   |
| <b>Δ4296</b>    | 300 <sup>a</sup> | 37 <sup>a</sup> | 12,3 <sup>a</sup> |

Total n= 300 cells measured. Data correspond to the average cell death — same letters meaning no significant difference according to *Tukey test*- 0.05.
